# Supplementary material
Source: HighWire-hosted journal article supplement (doi:10.1101/rna.067306.118)
Supplement: Supplemental_Figure_Legends.docx [file Supplemental_Figure_Legends.docx]

**Supplemental figure S1.** Conservation of the RgtA sRNA in the closely related *Bordetella* species. (A) Nucleotide sequence alignment of the *rgtA* locus of the *B. pertussis* Tohama I, *B. bronchiseptica* RB50 and *B. parapertussis* 12822 strains. The transcriptional start site identified by primer extension (rectangular arrow, +1), plausible -35 and -10 promoter sequences, putative RisA binding sites, region of partial complementarity to BP3831 mRNA and possible terminator are shown. *(B)* *B. pertussis* Tohama I (lane 1), *B. bronchiseptica* RB50 (lane 2) and *B. parapertussis* 12822 (lane 3) strains were grown in modified SS medium to exponential phase. RNA isolated from harvested cells was probed with biotinylated RgtA-specific probe and subjected to Northern blot analysis (upper panel). Signals obtained upon re-hybridization of the membrane with SsrA-specific probe (lower panel) served as loading control. Only relevant parts of the membranes are shown. The result is a representative of two experiments.

**Supplemental Figure S2.** Secondary structure of the RgtA sRNA as suggested by mfold software. The single-stranded 13-nt region between position 123 and 135 predicted to be involved in base-pairing with BP3831 mRNA is depicted with red line.
