# Supplementary material
Source: HighWire-hosted journal article supplement (doi:10.1101/rna.067306.118)
Supplement: Supplemental_Table_S1.xlsx [file Supplemental_Table_S1.xlsx]

## Sheet: logFC 0.5; adjP 0.025
SUPPLEMENTAL TABLE S1. The complete list of significantly differentially expressed genes ΔbvgAΔrgtA versus ΔbvgA
Code	Product	log2FC	adj.P.Vala
RgtA	sRNA	-9.00605	5.46686e-11
RgtA	sRNA	-8.81658	1.31035e-11
BP3050	putative membrane protein	0.589175	0.0205621
BP1487	putative periplasmic solute-binding protein	0.59076	0.0173964
BP0596	putative membrane protein	0.603668	0.0143138
BP1487	putative periplasmic solute-binding protein	0.649152	0.0061789
BP3050	putative membrane protein	0.649489	0.00494621
BP0596	putative membrane protein	0.669416	0.0161645
BP3831	putative ABC transporter periplasmic aminoacid-binding protein	1.24924	3.3445e-05
BP3831	putative ABC transporter periplasmic aminoacid-binding protein	1.27538	2.97495e-05
a log2FC ≥ 0.5 ; adj. P value ˂ 0.025
