# Supplementary material
Source: HighWire-hosted journal article supplement (doi:10.1101/rna.067306.118)
Supplement: Supplemental_Table_S2.docx [file Supplemental_Table_S2.docx]

**Supplemental table 2: *Bordetella* sp. strains used in this study.**

**Strain Characteristics Reference**

*B. pertussis* strains

Tohama I reference strain Kasuga *et al.* 1954

Δ*hfq* Tohama I strain carrying deletion of the *hfq* gene Bibova *et al.* 2013

Δ*rgtA* Tohama I strain carrying deletion of the *rgtA* gene this study

Δ*bvgA*  Tohama I strain carrying deletion of the *bvgA* gene this study

Δ*bvgS*  Tohama I strain carrying deletion of the *bvgS* gene this study

Δ*bvgR*  Tohama I strain carrying deletion of the *bvgR* gene this study

Δ*risA*  Tohama I strain carrying deletion of the *risA* gene this study

Δ*risA*Δ*bvgR* Tohama I Δ*risA* strain carrying deletion of the *bvgR* gene this study

ΔBP3831 Tohama I strain carrying deletion of the BP3831 gene this study

*rgtA*Δ277/217 Tohama I strain carrying deletion of the 60-bp region in the *rgtA* promoter this study

Δ*bvgA*Δ*rgtA* Tohama I Δ*bvgA* strain carrying deletion of the *rgtA* gene this study

Δ*bvgArgtA*mut Tohama I Δ*bvgA* deletion mutant carrying 4 point mutations in the *rgtA* gene this study

Other *Bordetella* sp. strains

*B. bronchiseptica* RB50 rabbit isolate, sequenced reference strain Cotter and Miller, 1994

*B. parapertussis* 12822 human clinical isolate, sequenced reference strain Heininger *et al.* 2002
