# Supplementary material
Source: HighWire-hosted journal article supplement (doi:10.1101/rna.067306.118)
Supplement: Supplemental_Table_S3.docx [file Supplemental_Table_S3.docx]

**Supplemental table 3: Oligonucleotides used in this study.**

| **Primer** | **Sequence*** | **Restriction enzyme** |
| --- | --- | --- |
| IGR2735/36_Seq_fw | ttttggtaccTTTTCGGGCTGCTTTGTAG | *Kpn*I |
| IGR2735/36_Seq_rev | ttttggatccTTGCCTATGCTTGCGGTTG | *Bam*HI |
| RgtA_up_fw_SpeI | aaaactagtCAATGGGCAAATCGAAGCG | *Spe*I |
| RgtA_up_rev_SacI | tctgagctcTGCTTTGAAAGGCGGCGCC | *Sac*I |
| RgtA_down_fw_SacI | aaagagctcGTAAACCCGCGTATCAAG | *Sac*I |
| RgtA_down_rev_BamHI | aatggatccTGAATATCTTGCCGTCCC | *Bam*HI |
| RgtA_PE | ATCCCGAGAAGCAGCCGTCAG |  |
| RgtA_NB | [Btn]ATCCCGAGAAGCAGCCGTCAG** |  |
| SsrA_NB | [Btn]CAGATCAGTGCAGCGGCTCAC** |  |
| bvgA_up_fw_SpeI | aaaactagtTACACGCCAACATCAGG | *Spe*I |
| bvgA_up_rev_NheI | ggtgctagcCATGATAAGAAGAATATGCTT | *Nhe*I |
| bvgA_down_fw_NheI | tatgctagcGCCTAGCGCCGCGCATG | *Nhe*I |
| bvgA_down_rev_BamHI | gaaggatccGGATGAGGGAAGTAATG | *Bam*HI |
| bvgS_up_fw_SpeI | tttactagtGCCATTCCTTTGACGCATC | *Spe*I |
| bvgS_up_rev_NheI | tatgctagcCATGCGCGGCGCTAGGC | *Nhe*I |
| bvgS_down_fw_NheI | tatgctagcCCCTGAAGCCACGAACCC | *Nhe*I |
| bvgS_down_rev_SpeI | ataactagtACGACGATACAGTGGGCG | *Spe*I |
| bvgR_up_fw_SpeI | tttactagtGACTTCCTGCGCTTCTGC | *Spe*I |
| bvgR_up_rev_KpnI | ttaggtaccATGGAGCAGTACTGACG | *Kpn*I |
| bvgR_down_fw_KpnI | aatggtaccTAAGGTCCGCGCAAGCAG | *Kpn*I |
| bvgR_down_rev_BamHI | aaaggatccGATGACCACAAACCCAACC | *Bam*HI |
| risA_up_fw_SpeI | aaaactagtGAAGGCCACCTTGTCGC | *Spe*I |
| risA_up_rev_NdeI | aaacatatgCATGGCCGGAAATGTAACA | *Nde*I |
| risA_down_fw_NdeI | tttcatatgACCTAATGGCCCGCCC | *Nde*I |
| risA_down_rev_BamHI | cccggatccTCATCTCGATTTCCAGGC | *Bam*HI |
| BP3831_up_fw_SpeI | tttactagtGACAGTTCGATGGGGTTGAG | *Spe*I |
| BP3831_up_rev_NheI | tttgctagcCATGTGTTGATCTCCTGTTAGG | *Nhe*I |
| BP3831_down_fw_NheI | aaagctagcCGCTGATCCGCTCCTGAAG | *Nhe*I |
| BP3831_down_rev_SpeI | tttactagtGCCAGCCAGCCCACGATG | *Spe*I |
| RgtAΔ277/217_up_fw_BamHI | ttttggatccTTGCCTATGCTTGCGGTTG | *Bam*HI |
| RgtAΔ277/217_up_rev_SacI | aaagagctcGATTGCTGCAAGGCGGGC | *Sac*I |
| RgtAΔ277/217_down_fw_SacI | tttgagctcAGCGGCTTTTGGCGCGTC | *Sac*I |
| RgtAΔ277/217_down_rev_BamHI | aaaggatccGGGATATAGGCAAAGGTGAAC | *Bam*HI |
| RgtAmut_up_fw_SpeI | aaaactagtCAATGGGCAAATCGAAGCG | *Spe*I |
| RgtAmut_up_rev_KpnI | gggggtaccTGCTTTGAAAGGCGGCGC | *Kpn*I |
| RgtAmut_down_fw_KpnI | aaaggtaccAAAAACTGAATCGCCAGCC | *Kpn*I |
| RgtAmut_down_rev_BamHI | aatggatccTGAATATCTTGCCGTCCC | *Bam*HI |
| BP3831fw | aaaccatggGCGCCACGTTCGACAACG | *NcoI* |
| BP3831rev | aaactcgagTCAGCGCACCGGCCAGCCGTAC | *XhoI* |

*Capital letters indicate *B. pertussis*-derived sequences, lowercase letters indicate sequences added for cloning purposes including restriction enzyme recognition sites (underlined)

** Oligonucleotides were labeled at 5´- end with biotin (Btn)
